# Supplementary material for: A facile synthetic route for the morphology-controlled formation of triazine-based covalent organic nanosheets (CONs)
Source: Royal Society of Chemistry journal article supplement (doi:10.1039/c7py01023k), 2017-01-01
Supplement: c7py01023k1.pdf [file c7py01023k1.pdf]

## Supporting information

# Facile Synthetic Route for the Morphology-Controlled Formation of Triazine-Based Covalent Organic Nanosheets (CONs)

Min-Sung Kim,<sup>a</sup> CheolSoo Phang,<sup>a</sup> Young Kyu Jeong,<sup>b\*</sup> and Jin Kuen Park<sup>\*\*a</sup>

## Materials and instruments

2,4,6-Tris(5-bromothiophene-2-yl)-1,3,5-triazine and 2,5-bis(trimethylstannyl)thieno-(3,2-b)thiophene were purchased from Luminescence Technology (Lum-Tec). Tetrakis(triphenylphosphine)palladium(0) was purchased from Alfa-Aesar. Mesitylene was obtained from Sigma-Aldrich. All reagents were stored in a glovebox charged with N<sub>2</sub>.

Fourier transform infrared (FT-IR) spectra were obtained on a Jasco FT/IR-4100 spectrometer with a 650-4000  $\text{cm}^{-1}$  range. UV-vis spectra were obtained on a Shimadzu UV-2600 spectrophotometer (Shimadzu, Japan) using a WI (halogen) lamp and a D2 (deuterium) lamp operating from 220 nm to 850 nm. Powder X-ray diffraction (XRD) patterns were obtained on an Empyrean Series 2 (PANalytical B.V., Netherlands) with Ni-filtered Cu-K $\alpha$  radiation ( $\lambda = 1.5406 \text{ \AA}$ ) with a 5-mm fixed incident beam mask and a 1.60 mm anti-scatter slit. The measurement angle ranged from 3° to 70° with time step increments of 0.0525° and 0.75 s per step. N<sub>2</sub> absorption-desorption isotherm curves were taken with a Belsorp-miniII (Bel Japan Inc.) using N<sub>2</sub> gas at 77 K. Scanning electron microscopy (SEM) images were obtained utilizing a Quanta 250 FEG (FEI Company, Hillsboro, OR). Additionally, the sample surfaces were coated with Au/Pd plasma for 60 s, and the sample images were obtained using a 15 kV electron beam. Transmission electron microscopy (TEM) images were recorded using a JEM-2100F (JEOL) with a voltage of 200 kV. The TEM samples were prepared by drop-casting suspensions on carbon films with 200 mesh copper grids (Electron Microscopy Sciences) after the samples were dispersed in DMF. The suspensions were prepared using a Sonics VCX 130 ultrasonic processor (130 W power output, 20 kHz frequency) with 3 mm homogenizer probe (Standard 630-0422, Vibra-Cell<sup>TM</sup>). The sonicator was run at 20% power using 1 pulse per second with a 2.5 s pulse length for 30 min. Atomic force microscopy (AFM) images were obtained on an NX10 (Park Systems). The AFM images were measured using noncontact mode and a scan rate of 0.5 Hz. The AFM samples were prepared by drop-casting suspensions in DMF on mica discs (V1



disc 10 mm, Probes). The suspensions were prepared using the same method as those for the TEM samples.

## Synthetic procedures

### 1. Synthesis of CON-10.

2,4,6-Tris(5-bromothiophene-2-yl)-1,3,5-triazine (M2) (0.05 g,  $8.863 \times 10^{-5}$  mol), 0.062 g of 2,5-bis(trimethylstannyl)thieno-(3,2-b)thiophene (M1) ( $1.331 \times 10^{-4}$  mol), 0.0041 g of tetrakis(triphenylphosphine)palladium(0) (4 mol%) and 3 mL of mesitylene were added to a one-neck flask in a glove box. A reflux condenser was also attached to the flask in the glove box. The solution was heated at 170 °C for 3 days with stirring. The molar ratio of M1 to M2 was 3:2. After the reaction, the solution was poured into methanol, and a red-colored precipitate was collected by filtration. Then, the red powder was purified by Soxhlet extraction with methanol, ethanol, dichloromethane, tetrahydrofuran, methanol, ethanol and acetone for 4 h per step. Finally, the red compound was obtained by vacuum drying for 12 h.

### 2. Synthesis of CON-16.

The procedures for the synthesis of CON-16 were same as those for CON-10, but all reagents and solvents were placed in an ampule in a glove box. Then, the ampule was flame sealed under vacuum at 77 K after degassing with three freeze-pump-thaw cycles under vacuum at 77 K with liquid N<sub>2</sub> in a dewar and thawing by charging N<sub>2</sub> gas. Then, the resulting mixture was heated in an oven (170 °C) for 3 days without stirring.

### 3. Solution preparation.

A series of CON suspensions were prepared by dissolving 4 mg of each CON in 1 mL of chlorobenzene with 1-chloronaphtalene, THF, DMF or DMSO with ultrasonication for 30 min, followed by preparing the sample for TEM analysis as described in the materials and instruments section.

### 4. Film formation

Films were prepared by dropping the suspensions on silicon wafers (2 cm × 2 cm). The wafers were sequentially washed with ethanol and acetone using ultrasonication (20 min



each) and then dried with N<sub>2</sub>. The prepared solutions were dropped via a single drop on the Si wafers. Then, the wafers were dried in air at room temperature overnight.

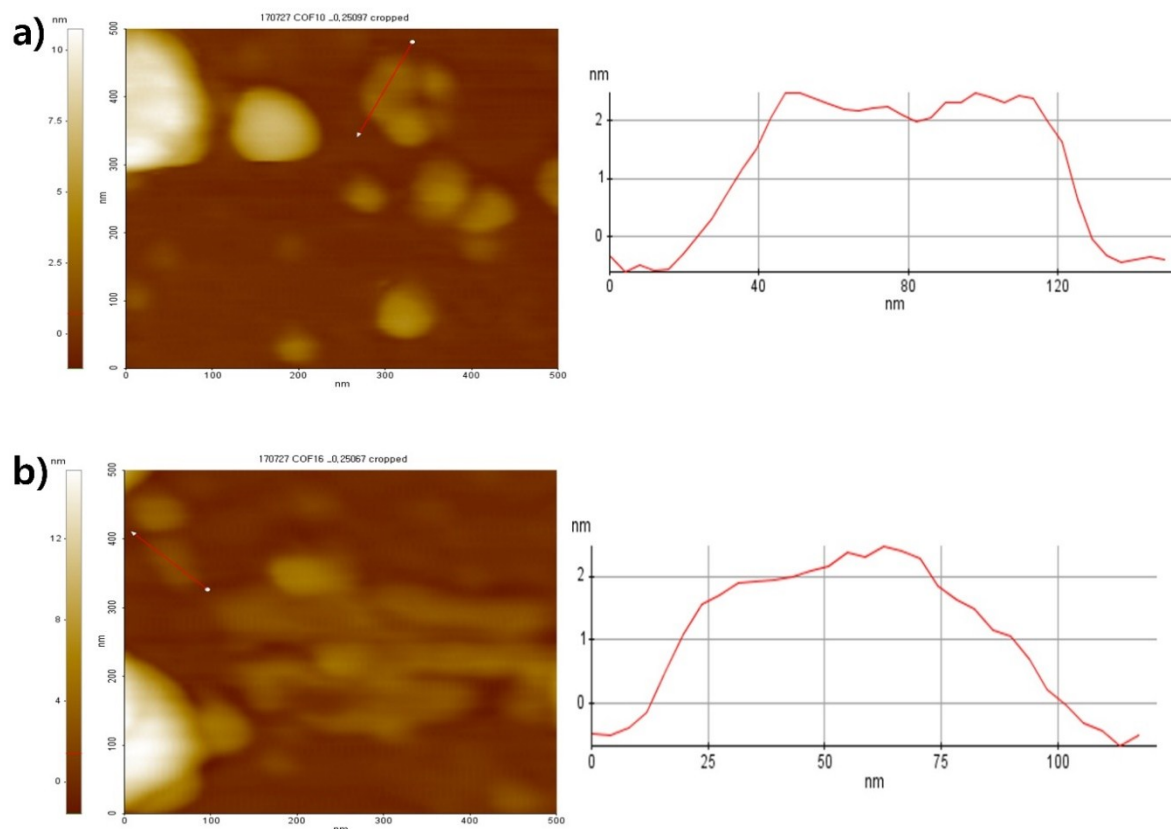

Figure S1. (a) AFM image of CON-10 on a mica surface (left) and the height profile of the primary particles of CON-10 (right); (b) AFM image of CON-16 on a mica surface (left) and the height profile of the primary particles of CON-16 (right).



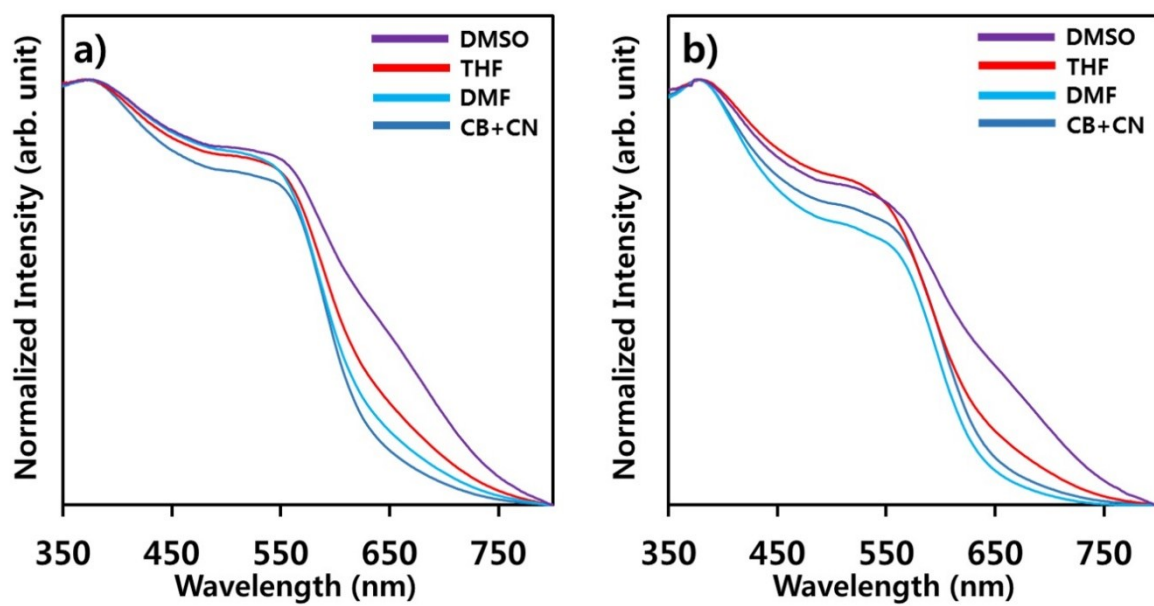

**Figure S2.** Normalized UV-Vis absorbance spectra of CON-10 (a) and CON-16 (b) films casted from various solvents.
